# Supplementary material for: Investigating the effects of ultrafine bubbles on bacterial growth
Source: Royal Society of Chemistry journal article supplement (doi:10.1039/d3ra07454d), 2024-01-01
Supplement: d3ra07454d1.pdf [file d3ra07454d1.pdf]

### Supplementary information for

#### Investigating the effects of ultrafine bubbles on bacterial growth

**Table S1.** Percent variation in laser scattering of three culture media over time at room temperature (25°C) (compared to the start time).

| Time (hour) | Percent variation (%) |       |      |
|-------------|-----------------------|-------|------|
|             | DW                    | AUFB  | HUFB |
| 1           | 1.34                  | 5.33  | 3.50 |
| 2           | -2.66                 | 0.54  | 3.14 |
| 3           | -3.29                 | -0.89 | 2.47 |
| 4           | -1.86                 | 3.39  | 3.39 |
| 5           | -1.04                 | 3.62  | 3.96 |
| 6           | 1.48                  | 3.45  | 5.31 |

**Table S2.** Live cell count result.

(A) The average live cell concentration of five culture media.

| Media      | Live cell concentration (cells ml <sup>-1</sup> ) |
|------------|---------------------------------------------------|
| DW         | $15.2 \times 10^5 \pm 13.0 \times 10^4$           |
| AUFB       | $42 \times 10^5 \pm 12 \times 10^4$               |
| AUFB – SDS | $43 \times 10^5 \pm 12 \times 10^4$               |
| HUFB       | $91.4 \times 10^5 \pm 11.4 \times 10^4$           |

|            |                                     |
|------------|-------------------------------------|
| HUFB - SDS | $92 \times 10^5 \pm 16 \times 10^4$ |
|------------|-------------------------------------|

(B) Mann-Whitney U test results showed no significant difference in live cell concentration between each pair of UFB culture media (AUFB and AUFB-SDS; HUFB and HUFB-SDS).

| Cultture media | Sample size | Test values |         | Significance level ( $\alpha$ ) |
|----------------|-------------|-------------|---------|---------------------------------|
|                |             | U critical  | U score |                                 |
| AUFB, AUFB-SDS | 5, 5        | 6           | 2       | 0.05                            |
| HUFB, HUFB-SDS | 5, 5        | 9.5         | 2       |                                 |

**Table S3.** Statistical results from one-tailed t-test on the difference between the size average of bacteria in each pair of culture media.

| Species          | Null hypothesis  | Sample size | p-value               | Significance level ( $\alpha$ ) |
|------------------|------------------|-------------|-----------------------|---------------------------------|
| <i>E. coli</i>   | DW $\geq$ AUFB   | 150, 150    | $0.25 \times 10^{-3}$ | 0.05                            |
|                  | DW $\geq$ HUFB   | 150, 150    | $2.3 \times 10^{-17}$ |                                 |
|                  | AUFB $\geq$ HUFB | 150, 150    | $2.9 \times 10^{-7}$  |                                 |
| <i>S. aureus</i> | DW $\geq$ AUFB   | 150, 150    | $1.1 \times 10^{-9}$  |                                 |
|                  | DW $\geq$ HUFB   | 150, 150    | $2.1 \times 10^{-24}$ |                                 |
|                  | AUFB $\geq$ HUFB | 150, 150    | $2.7 \times 10^{-13}$ |                                 |
